# Supplementary material for: Surveying pulsating auroras
Source: Copernicus journal article supplement (doi:10.5194/angeo-2019-129), 2019-09-06
Supplement: Supplementary file [file angeo-2019-129-AC2-supplement.pdf]

# Surveying pulsating auroras

Eric Grono<sup>1</sup> and Eric Donovan<sup>1</sup>

<sup>1</sup>Department of Physics and Astronomy, University of Calgary, Calgary, Alberta, Canada

**Correspondence:** Eric Grono (emgrono@ucalgary.ca)

**Abstract.** The early morning auroral oval is dominated by pulsating auroras. ~~This category of aurora has~~ These auroras have often been discussed as if ~~it is just they are~~ one phenomenon, but ~~it is they are~~ not. Pulsating auroras are separable based on the extent of their pulsation and structuring into at least three subcategories. This study surveyed 10 years of all-sky camera data to determine the occurrence probability for each type of pulsating aurora in magnetic local time and magnetic latitude. Amorphous

5 ~~pulsating aurora~~ Pulsating Aurora (APA) is found to be a nearly ubiquitous early morning aurora, ~~and having an 86 % chance~~ of occurrence at its peak. ~~Patchy Pulsating Aurora (PPA) and Patchy Aurora (PA) are less common, peaking at 21 % and 29 %, respectively. Before local midnight,~~ pulsating aurora is almost exclusively ~~amorphous pre-midnight~~ APA. Occurrence distributions ~~for each type of pulsating aurora of APA, PPA, and PA~~ are mapped into the magnetosphere to approximately ~~determine the location of equatorial plane to approximately locate~~ their source regions. The ~~patchy and patchy pulsating aurora~~ APA and PPA distributions primarily map to locations approximately between 4 and 9  $R_E$ , while some ~~amorphous pulsating~~ aurora ~~APA~~ maps to farther distances, ~~-, suggesting that the mechanism which structures PPA and PA is constrained to the inner magnetosphere. This is in agreement with Grono and Donovan (2019), which located these auroras relative to the proton~~ aurora.

*Copyright statement.* TEXT

## 15 1 Introduction

If one looks at the aurora for just a few hours, it is obvious that there are different types. If one looks at enough aurora, it becomes apparent that a relatively small number of specific auroral types dominate the overall phenomenon. Historically, early auroral researchers classified auroras based on their appearance. This morphological classification lacks any connection to the magnetospheric or magnetosphere-ionosphere-coupling mechanisms that might cause a specific type of aurora.

20 More recently, auroral types have been considered with regard to the physical drivers of these processes, and great headway has been made differentiating them based on the mechanism responsible for their particle precipitation. In the broadest sense, there are two types of mechanism corresponding to two overarching auroral classifications. In some auroras, electric fields parallel to the magnetic field—so called parallel electric fields—increase particles' kinetic energy parallel to the magnetic field, shifting their pitch angle into the loss cone. Such auroras are classified as *discrete*, an example of which is the auroral

25 arc. In other auroras, stochastic interactions with plasma waves or magnetic field curvature scatter particles' pitch angles into the loss cone. In these cases, the aurora is classified as *diffuse*.

Pulsating auroras are a type of diffuse aurora characterized by quasi-periodic pulsations and precipitating electron energies between a few keV and hundreds of keV (Johnstone, 1978). They generally have an irregular, patchy structure (Royrvik and Davis, 1977) which constantly evolves in time (Shiokawa et al., 2010). The spatial size of pulsating auroral structures has been  
30 measured to range from one to hundreds of kilometers across (Royrvik and Davis, 1977). Measurements of pulsating aurora altitude thicknesses are scarce, but Jones et al. (2009) measured a pulsating auroral patch to between 15 and 25 kilometres thick.

Pulsating aurora events occur most often in the morning-sector where they persist for an average of 1.5 hours (Jones et al., 2011; Partamies et al., 2017), but events lasting upwards of 15 hours have been observed (Jones et al., 2013). It is unknown  
35 exactly how long pulsating aurora events can persist for. Measurements of pulsating aurora event durations are conservative because ground-based cameras, our primary tool for optically observing the aurora, cannot operate past sunrise (Partamies et al., 2017). The lifetimes of individual structures are known to range from a few seconds to tens of minutes (e.g., Grono et al., 2017; Grono and Donovan, 2018).

Pulsating auroral features exhibit diverse characteristics, varying in terms of shape, size, brightness, altitude, spatial sta-  
40 bility, modulation, lifespan, and velocity, yet little effort has been spent on differentiating them. Historically, pulsating aurora was subcategorized by Royrvik and Davis (1977) into patches, arcs, and arc segments, but modern literature generally only refers to “pulsating aurora” and “pulsating auroral patches” (~~Yang et al., 2019; Partamies et al., 2019; Ozaki et al., 2019~~)  
(e.g., Yang et al., 2019; Partamies et al., 2019; Ozaki et al., 2019) and would not consider the “streaming arc” of Royrvik and Davis (1977) to be a type of pulsating aurora. Grono and Donovan (2018) recently used all-sky camera data to define criteria  
45 for differentiating pulsating aurora based on their phenomenology. They identified three types of pulsating aurora which were separable based on their pulsation and structure. Amorphous Pulsating Aurora (APA) evolves so rapidly in both shape and brightness that it is usually difficult — and often impossible — to uniquely identify structures between successive images at a 3 second cadence. Patchy Pulsating Aurora (PPA) consists of highly structured patches which can persist for tens of minutes and pulsate over much of their area. Patchy Aurora (PA) structures are similar to PPA but do not oscillate in brightness. While  
50 it may be oxymoronic to describe a non-pulsating feature as pulsating aurora, PA and PPA are clearly closely related in terms of the underlying scattering mechanism responsible for the precipitation. Based on their appearance in the ionosphere, these two auroras seem to be differentiated only by the existence of a modulating mechanism in the magnetospheric source region. Herein we use the term “pulsating aurora” to collectively refer to APA, PPA, and PA, and the acronyms will be used to identify them individually.

55 Pulsating aurora has been shown to be pervasive in the morning sector (Jones et al., 2011; Partamies et al., 2017), but we believe those studies conflated at least APA and PPA, while possibly ignoring PA altogether due to its relative lack of pulsation (Grono and Donovan, 2018). Nishimura et al. (2010, 2011) connected specific examples of APA and PPA, without differentiating them, with specific chorus elements in the equatorial magnetosphere. Yang et al. (2015, 2017) related the individual motion of PPA and PA patches to convection in the ionosphere, and their source regions to convection in the magnetosphere.

60 Yang et al. (2019) observed one event where APA was associated with higher energy electron precipitation than was PPA. By  
locating the latitude boundaries of pulsating auroras relative to the proton aurora, Grono and Donovan (2019) discovered that  
they occur either within or equatorward of the proton aurora. PPA and PA were observed to occur predominantly equatorward  
of the optical b2i (Donovan et al., 2003), which is the ionospheric counterpart to the isotropy boundary for plasma sheet protons  
and marks the inner boundary of the thin current sheet. APA also occurred there, but in addition, it regularly extended into the  
65 transition region where the band of proton aurora luminosity originates from and the magnetic field is stretched.

The aurora is a powerful tool for remote sensing the large-scale dynamics of the magnetosphere. Pulsating aurora is a  
widespread type of aurora which we do not yet understand the subcategories of, ~~subcategories that could provide valuable,~~  
This gap in our collective knowledge limits the information about the state of magnetosphere. ~~While pulsating aurora surveys~~  
that can be inferred from pulsating aurora. While surveys of pulsating aurora have been done previously (Jones et al., 2011;  
70 Partamies et al., 2017), they have not distinguished between different types. This study presents the first separate surveys of  
occurrence probabilities for APA, PPA, and PA.

## 2 Data and methodology

To survey pulsating aurora occurrence, the Time History of Events and Macroscale Interactions during Substorms (THEMIS)  
all-sky imager (ASI) array was used. This network of imagers (Donovan et al., 2006; Mende et al., 2008) is the ground-based  
75 component of the NASA mission (Angelopoulos, 2008) designed to study the aurora and substorms using conjoined ground-  
based and space-borne observations. The ASIs capture panchromatic, or “white light”, images of the aurora at a 3 second  
cadence on a  $256 \times 256$  pixel CCD and have been operating for over 10 years, amassing tens of millions of images. It can  
be surmised from Jones et al. (2011) that pulsating aurora is visible within the order of 10 % of these images (Grono et al.,  
2017). Of the 21 imagers deployed across North America, those stationed at Rankin Inlet, Nunavut (RANK); Gillam, Manitoba  
80 (GILL); and Pinawa, Manitoba (PINA) were utilized for this study. The locations and fields of view of these imagers are shown  
in Figure 1. The fields of view are drawn at 10 degrees of elevation relative to the imager at an altitude of 110 kilometres.

Data from these ASIs were viewed as keogram-style images (Eather et al., 1976) illustrating the evolution of aurora in time  
and one spatial dimension, which in this case was aligned to the Gillam magnetic meridian at  $-26.1089$  degrees magnetic  
longitude (MLON). These keograms, an example of which is Figure 2, were arranged and aligned in a stack to give a wide  
85 view of the aurora along this meridian so that the upper and lower magnetic latitude boundaries of pulsating auroral events  
could be identified. The location of this meridian relative to the fields of view of the ASIs can be seen in Figure 1.

Across 2006 through 2016, 280 days were identified where visibility was simultaneously clear at all three sites. Keograms  
were created for each day of data to search for pulsating aurora. To ensure that the start and end times could be identified  
precisely and that short periods of pulsating aurora would not be missed, dates were split into multiple 1-hour-sized keograms.  
90 However, in general, there was not an integer number of hours of clear data, so each day ~~would also have also had~~ one shorter  
keogram containing the remaining data.

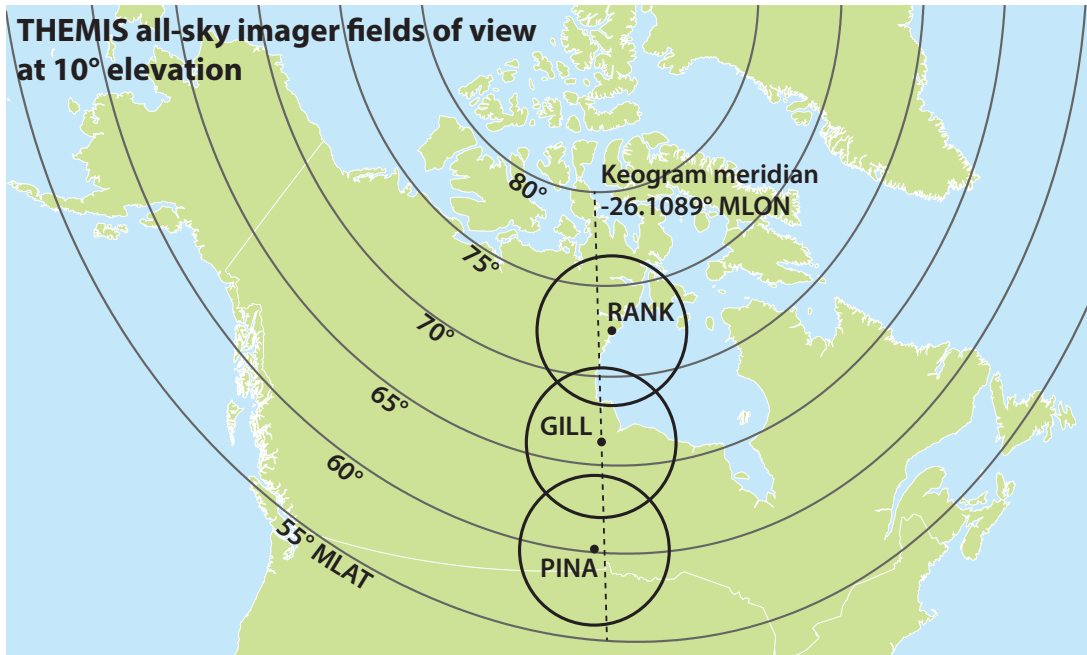

**Figure 1.** The locations and fields of view of the three THEMIS [ASI-ASIs](#) utilized in this study. The imagers are located in Rankin Inlet, Nunavut; Gillam, Manitoba; and Pinawa, Manitoba. The fields of view are drawn at 10 degrees elevation assuming an altitude of 110 kilometres.

Within each keogram, the upper and lower latitude boundaries as well as the start and end times of pulsating aurora events were identified by-eye and recorded. One spatial dimension does not necessarily provide enough information to accurately define the boundaries of pulsating aurora, but it provides a reasonable estimate when the alternative is to define the boundaries for hundreds of thousands of individual ASI images. This simple method of defining the event boundaries is often imprecise since the size of the region which pulsating auroras cover can change, in addition to its location. Multiple sets of boundaries were often used to better define where pulsating aurora was occurring within the keograms in order to compensate. Despite this limitation, more precise and accurate methods of defining the event boundaries are prohibitively time consuming for a dataset of this size.

100 The latitude and temporal boundaries were recorded separately for APA, PPA, and PA-, [which is illustrated in Figure 2. This sample image from the dataset features colour-coded rectangles marking where each pulsating aurora type was identified.](#)

105 [To identify the boundaries of each type, certain characteristic features are searched for.](#) PPA and PA move with ionospheric convection (Yang et al., 2015, 2017; Grono et al., 2017; Grono and Donovan, 2018) and have a stable, well-defined structure that creates pathlines in keograms. Pathlines trace the trajectory of PPA and PA patches along the keogram meridian and arise due to the long-lived nature of PPA and PA patches. These are the primary signature used for identifying PPA and PA in keograms. Since PA patches do not pulsate, they are separable from PPA by the presence of vertical striations within the



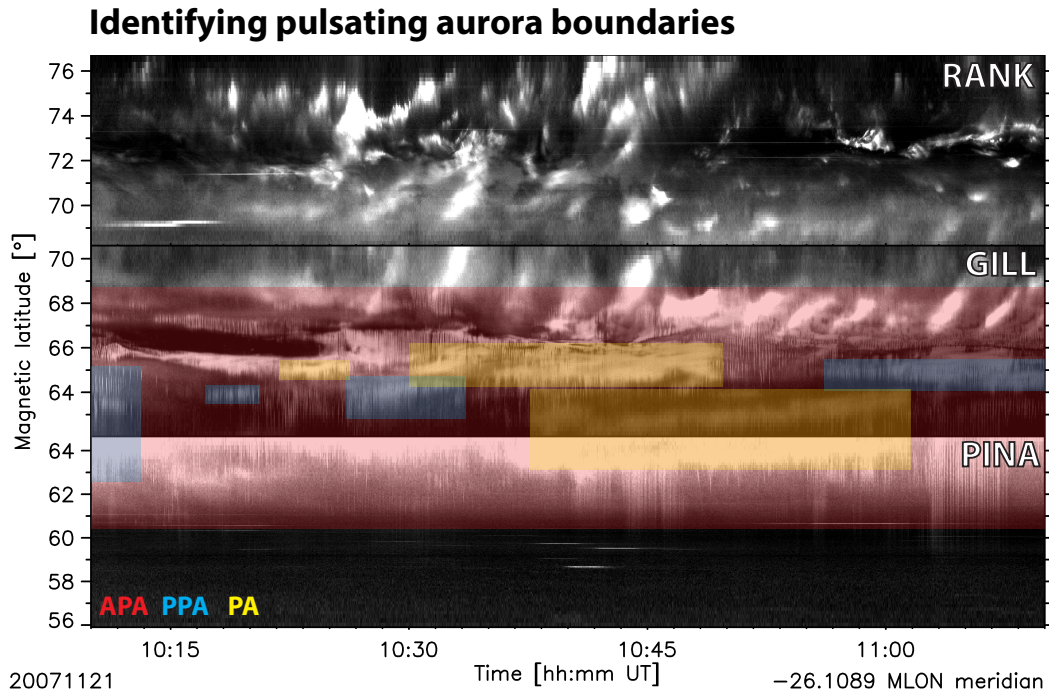

**Figure 2.** An example of a keogram used to approximately define pulsating aurora occurrence. The regions where amorphous pulsating aurora (APA, red), patchy pulsating aurora (PPA, blue), and patchy aurora (PA, yellow) can be identified in the keogram are marked with rectangles. The meridian that the keograms are aligned along is illustrated in Figure 1.

pathline which are indicative of pulsation. The appearance of APA within keograms cannot be described as simply, but it is primarily identified by vertical striations and a lack of well-defined structure.

Based on this, it is generally straightforward to uniquely identify each type of pulsating aurora within keograms (Grono and Donovan, 2018), but certain events can be ambiguous and in these instances the full all-sky images were inspected. Occasionally it can be unclear whether an event is APA or PPA. This can be due to a lack of spatial information provided by the keogram-style image, but it can also be hard to determine whether an event is APA that is atypically structured, or PPA that is relatively unstructured. Since PPA and PA events will feature many patches, the presence of multiple pathlines can be a helpful indicator for recognizing these auroras. PPA and PA move with convection, so the pathlines of multiple patches will have similar trajectories within an event. In addition, APA seems to be present during every pulsating aurora event (Grono and Donovan, 2018), so its presence is a helpful indicator when searching for PPA and PA. The nature of the relationship between these three types of pulsating aurora is unclear, and gradation appears to exist between them (Grono and Donovan, 2018), which can complicate identification.

~~Figure 2 illustrates the process of identifying pulsating auroras within a keogram. This sample image from the dataset features colour-coded rectangles marking where each pulsating aurora type was identified.~~ Pathlines are not exclusive to pulsating auroral patches, however, as arcs can also produce them, as seen in Figure 3. Auroral events featuring multiple equatorward-moving

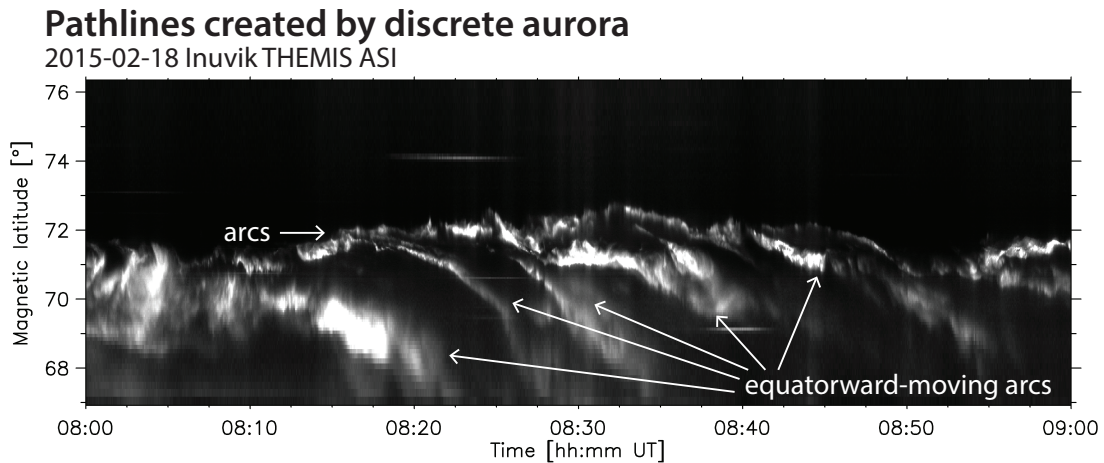

**Figure 3.** An example of equatorward arcs creating multiple pathlines that move in the same direction. These images were captured by the THEMIS ASI stationed in Inuvik, Nunavut on 18 February 2015.

arcs will produce multiple pathlines which move in the same direction. Despite the apparent similarity of such structuring to that of PPA and PA, they are distinguishable from each other with practice.

125 An example of a keogram used to approximately define pulsating aurora occurrence. The regions where amorphous pulsating aurora (APA, red), patchy pulsating aurora (PPA, blue), and patchy aurora (PA, yellow) can be identified in the keogram are marked with rectangles. The meridian that the keograms are aligned along is illustrated in Figure 1.

### 3 Results

We searched 10 years of clear auroral observations, and in Figure 3-4 we present separate distributions of occurrence probability for each type of pulsating aurora in magnetic local time (MLT) and magnetic latitude (MLAT). These occurrence probabilities are calculated by dividing the number of days a particular type was observed in a bin by its number of days of clear observations. 130 The number of hours of data of each pulsating aurora type that went into panels 3-4a-c are 462 hours of APA, 44 hours of PPA, and 58 hours of PA, respectively. These totals are not exact because they are a sum of the timespans each set of boundaries covered, which can overlap. This can be seen in Figure 2, where two PA regions overlap in time. Overlapping boundaries are not so common as to dominate this calculation and as such these totals are reasonable estimates of the amount of observations. 135 Figure 3-4d shows the number of days each MLT bin was observed, and within each of these the coverage of the MLAT bins is uniform since our event selection required clear visibility across each ASI.

APA is seen in Figure 3-4a occurring in a band from 17 to 7 MLT between 56 and 75 degrees MLAT, peaking during 3.5 to 6 MLT at 66 to 70 degrees MLAT with an ~86 % probability. This band appears wider at later MLT. Figure 3-4b shows PPA predominantly arising in a band from 23 to 6.5 MLT over 57 to 73 degrees MLAT, and to a much lesser extent between 17.5 140 to 19.5 MLT when the bins are populated by only a single day of data. PPA occurrence probability peaks at ~21 % from 4 to

# When and where pulsating auroras form

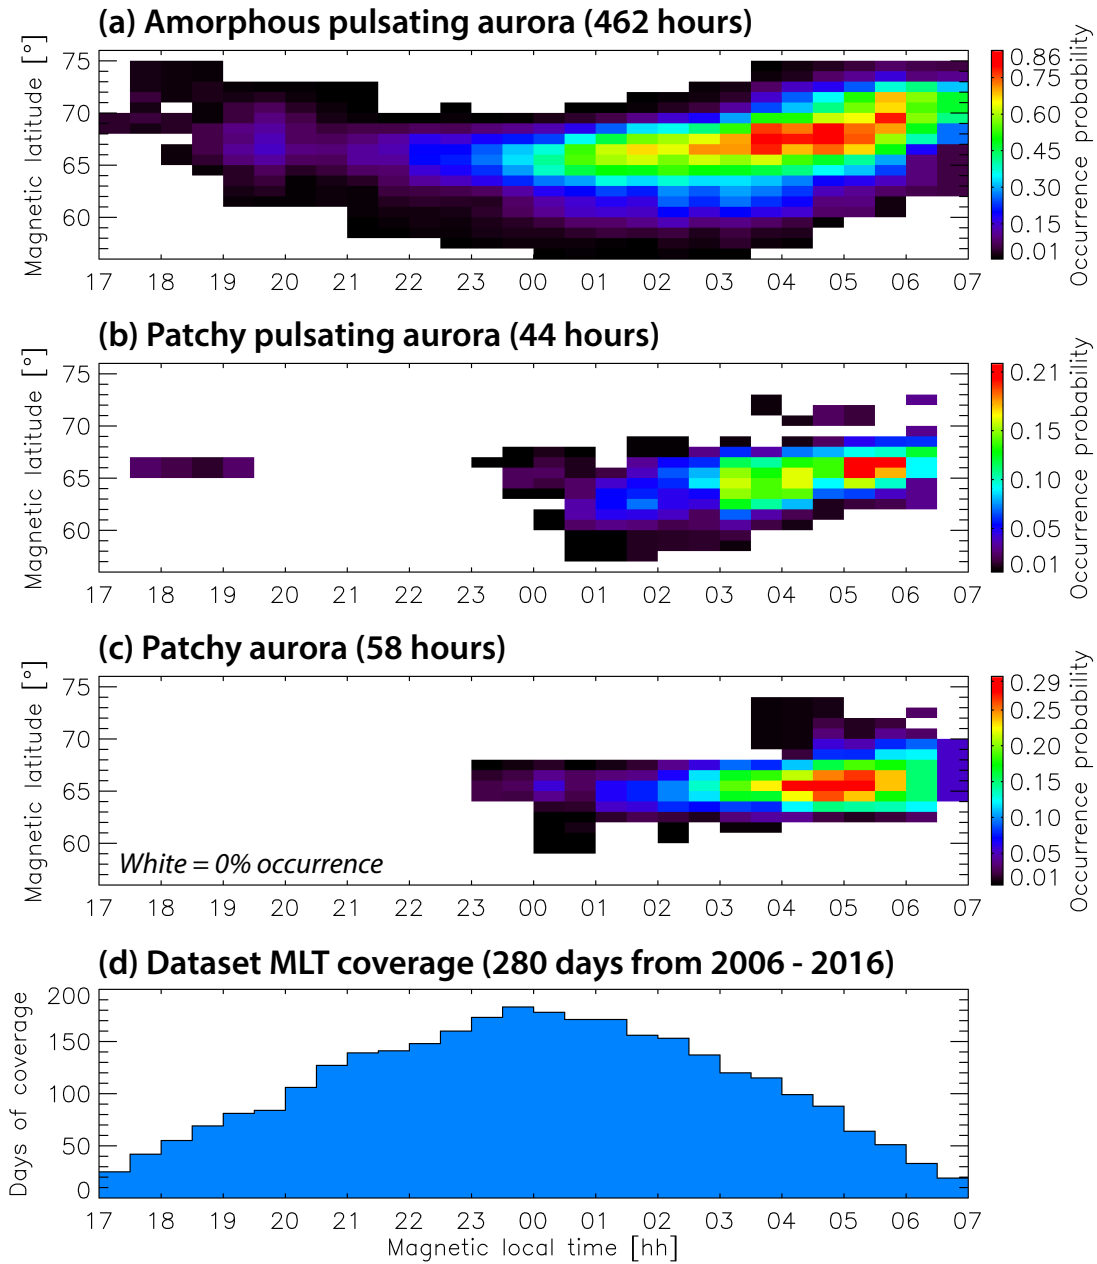

**Figure 4.** Occurrence probability of pulsating auroras based on a survey of times when Rankin Inlet, Gillam, and Pinawa THEMIS ASI had good visibility between 2006 through 2016. White bins in panels (a), (b), and (c) have data coverage but no events, corresponding to a 0% occurrence probability. Panel (d) shows the number of days of data that had clear visibility in each MLT bin and coverage is uniform across the MLAT bins.

5.5 MLT between 65 to 67 degrees MLAT. PA is shown in Figure 34c to occur in a band stretching from 23 to 7 MLT between 59 to 74 degrees MLAT. The peak occurrence probability of PA is  $\sim 29\%$  between 4 to 5.5 MLT from 65 to 66 degrees MLAT. The latitude of the PA occurrence band is less obviously dependant on magnetic local time than the other pulsating auroras in these data. This is possibly due to having fewer observations of PPA and PA, which each have on the order 10% of the observations that APA has. PPA and PA occur in a narrower band than APA. The range of latitudes where pulsating auroras can develop evolves over MLT, following the same trend as the auroral oval, moving to higher latitude with increasing distance from local midnight.

In Figure 34, the peak activities of each of the three types of pulsating aurora appear to differ in both MLT and MLAT, but they are difficult to compare when plotted separately as two-dimensional histograms. Figure 45 reduces Figure 34a-c to two separate one-dimensional histograms in MLT and MLAT, allowing the occurrence distributions to be more easily compared. Panel 3a-5a shows that APA covers a larger range of latitudes than PPA and PA, extending farther poleward than both. PPA appears to develop nearly as far equatorward as APA, although PA does not. Furthermore, the peak occurrence of APA appears to be 1 to 2 degrees MLAT poleward of PPA and PA. In panel 3b-5b, PPA and PA have similar MLT distributions whose peaks approximately align with a local maximum of APA that is  $\sim 3$  hours later than its peak.

#### 4 Discussion and conclusions

The latitude and temporal boundaries of pulsating auroras that were recorded during the survey provide sets of coordinates which can be traced into the equatorial plane of the magnetosphere to estimate the location of their source regions. In this context, a set of boundaries refers to any individual rectangular region used to define the occurrence of pulsating aurora within a keogram, such as those seen in Figure 2. Since a set of boundaries can cover long periods of time and therefore correspond to a large region in the equatorial plane, we split each set into 1 minute slices to more accurately map the shape of its source region. The start and end times of each set were rounded down to the nearest minute, and the latitude boundaries were mapped into the equatorial plane at each minute in-between.

~~To describe how Figure 5 was created, two sets of bins must be defined. The total bins are what are shown in Figure 5, these bins count Figure 6 shows distributions counting the number of sets of boundaries that mapped to a particular region of the equatorial plane. In addition, each set of boundaries has their own set of bins in XY GSM coordinates, matching the grid seen boundaries — that is, the rectangles in Figure 5, which we will call the event bins. The event bins are used to record where the slices of each set map to before being added to the total bins.~~

~~The XY GSM coordinates of the poleward and equatorward latitude boundaries of a slice form a line in the equatorial plane. We used bins that were 2 — that intersect with  $1 R_E$  by  $1 R_E$ , which are large enough to avoid any issues related to the fact that we only mapped two locations instead of a rectangular region. For each slice, the event bins their line covered were iterated by 1, and within each set of boundaries, many slices mapped to the same bins. However, each set is only allowed to count toward the total once, so after every slice has been mapped and added to the event bins, the event bins must be clamped between 0~~

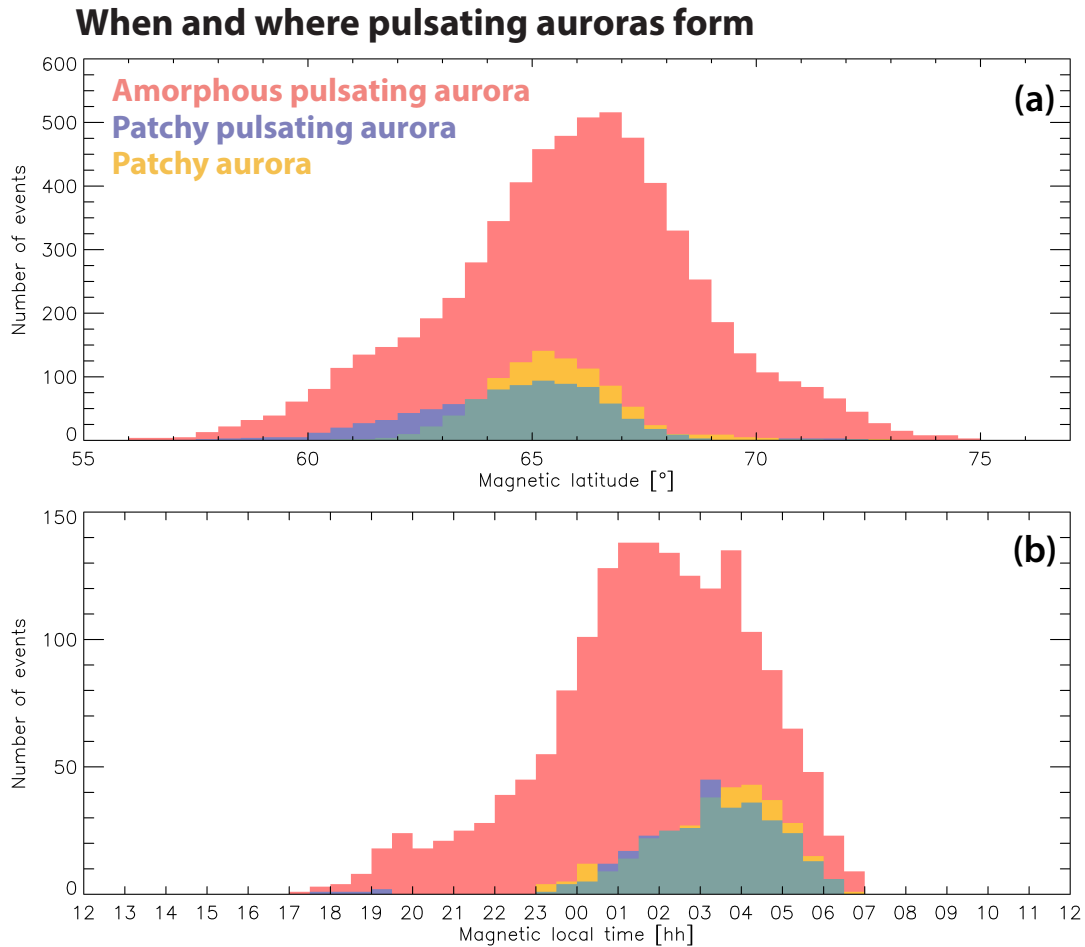

**Figure 5.** Figure 3-4 reduced in dimension to separate histograms in MLT and MLAT to allow easier comparison of occurrence between the types of pulsating aurora.

~~and 1. Thus, when the event bins are added to the total bins, they contribute only 1. Repeating this for every set of boundaries produced the distributions shown in Figure 5.~~

175 ~~The boundaries were mapped into bins when mapped into the magnetosphere using the T89 magnetic model (Tsyganenko, 1989)~~  
~~. These bins are in the XY Geocentric Solar Magnetospheric (GSM) equatorial plane where the Z GSM component of the~~  
~~magnetic field changes from being directed away from Earth to toward it. Each boundary is mapped at a one minute time~~  
~~resolution to ensure its shape in the equatorial plane using the accurately reflects changing geomagnetic conditions.~~

180 ~~The T89 magnetic model (Tsyganenko, 1989) model was~~ passed the planetary K-index (Kp) and solar wind velocity GSE  
~~Geocentric Solar Ecliptic (GSE) X component. Newer models were tested, but the mapped distributions did not meaningfully~~  
~~change. The purpose of mapping the occurrence distributions is to estimate the average location of the source regions, as~~

## Pulsating aurora occurrence mapped to the equatorial plane

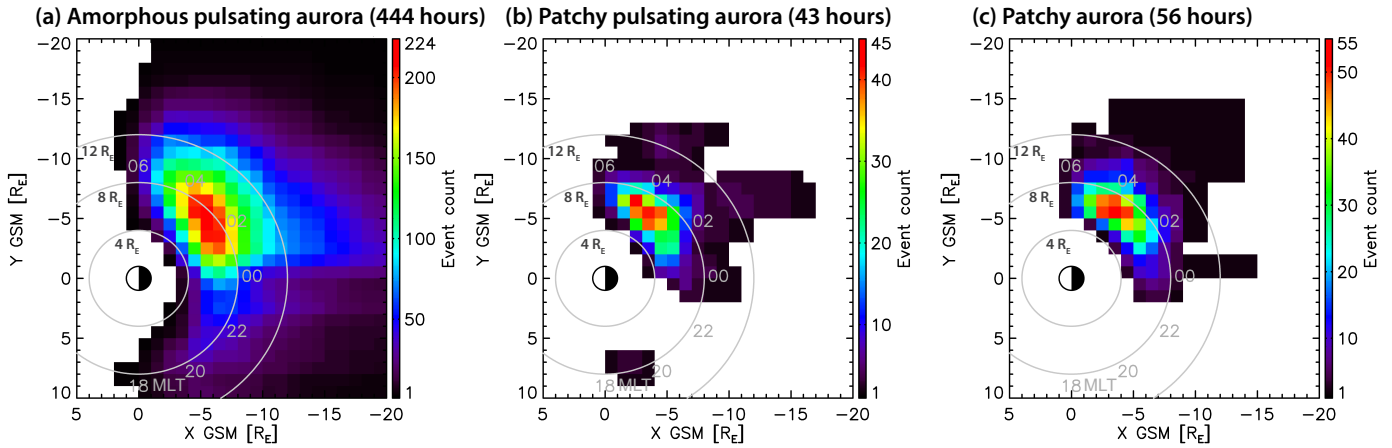

**Figure 6.** Pulsating aurora occurrence mapped to the equatorial plane. Pulsating aurora time and latitude boundaries were mapped using the T89 model (Tsyganenko, 1989) given Kp and the solar wind velocity GSE X component. This figure is based on the same set of events as shown in Figure 34, excluding those with poor solar wind data.

~~opposed to accurately tracing single rather than accurately tracing individual~~ events. To this end, the decreased computation time of the T89 model was deemed more valuable than an increase in accuracy which had little impact on the distributions.

Figure 5-6 does not show a mapping of the occurrence probability, but merely where the events were located. As stated previously, the purpose of this figure is only to approximately locate the source regions of pulsating auroras. Fewer events are used to create the panels in Figure 5-6 than Figures 3 and 4-4 and 5 because events were ignored if at least 90 % of the solar wind velocity data was bad data, otherwise the bad data was replaced with values interpolated from the valid data points. According to Figure 5-6, PPA and PA predominantly originate from a region between roughly 4 and 9  $R_E$ . Before local midnight, APA is similarly constrained, however, a portion of the APA distribution maps beyond 9  $R_E$  post-midnight. If you ignore the lowest population bins, it extends as far out as approximately 15  $R_E$ .

These distributions are in agreement with Grono and Donovan (2019), which reported PPA and PA being constrained to more equatorward latitudes than APA relative to the proton aurora. The bright band of auroral luminosity created by proton precipitation is known as “the proton aurora”. Proton precipitation occurs when the pitch angles of magnetically trapped protons are scattered as the the particles pass through tight magnetic field curvature in the equatorial plane (Tsyganenko, 1982; Sergeev et al., 1983). The Earthward limit of this stochastic scattering mechanism is the isotropy boundary (e.g., Sergeev et al., 1983), which is located where the magnetic field transitions from being stretched to mostly dipolar. There is an equivalent boundary in the ionosphere, called the optical b2i (Donovan et al., 2003), which marks the rapid decrease of downgoing proton fluxes. Grono and Donovan (2019) found that all pulsating aurora occurred either within or equatorward of the proton aurora. PPA and PA occurred predominantly equatorward of the optical b2i, indicating that they originate from a region where magnetic field topology is mostly dipolar. APA was seen poleward of the optical b2i, but still within the proton aurora.

We know that the proton aurora occurs primarily along and tailward of the transition region between dipolar and stretched magnetic field, and that it occurs at higher latitudes further from local midnight. However, observations of the bright proton aurora's source region have been limited to near magnetic midnight. Spanswick et al. (2017) related the luminosity of the proton aurora to in situ downward proton energy fluxes measured by THEMIS ~~spacecrafts~~ spacecraft in the magnetotail near midnight. They determined that the source region of most proton aurora was located between 6 and 10  $R_E$  at this time, although some could map beyond this. ~~This agrees with our observations~~ Interpreting this distance range as the farthest limit of pulsating aurora in the equatorial plane near magnetic midnight (Grono and Donovan, 2019), our observations are in agreement.

Global distributions of lower-band whistler-mode chorus (Li et al., 2011), a primary driver of pulsating aurora (e.g., Nishimura et al., 2010, 2011), also indicate that these are realistic distributions of the pulsating aurora source regions. Li et al. (2011) reported lower-band chorus occurrence primarily between 5 and  $\sim 8 R_E$  near magnetic midnight, and a wider occurrence region post-midnight between 5 and 10  $R_E$ . They only surveyed events between 5 and 10  $R_E$ , the most dominant region for lower-band chorus.

APA is a nearly ubiquitous early morning auroral phenomenon which dominates the morning-sector auroral oval. Pulsating aurora is almost exclusively APA between 17 and 23 MLT, during which time PPA was seen on a single day and PA was never seen. APA is the most common type of pulsating aurora, occurring as often as  $\sim 86\%$  of the time between 3.5 and 6 MLT. PPA and PA occurrences peak at  $\sim 21\%$  between 5 and 6 MLT and  $\sim 29\%$  from 4 to 5.5 MLT, respectively. APA ~~develops~~ extends farther poleward than PPA and PA, and farther equatorward than PA. The range of latitudes where pulsating aurora can ~~develop~~ exist varies with MLT, following the auroral oval and reaching its most equatorward latitude at  $\sim 2$  MLT.

These results are in agreement with recent work by Jones et al. (2011) and Partamies et al. (2017) which reported pulsating aurora occurrence statistics. We suspect that both of these studies included a combination of APA and PPA in their statistics and likely ignored PA. The prevalence of APA indicates that their results should largely reflect the behaviour of APA. Jones et al. (2011) examined 119 days of optical data from the Gillam THEMIS ASI between September 2007 and March 2008, finding that the occurrence rate of pulsating aurora events increases rapidly around magnetic midnight from a small percentage to roughly 50%. Occurrence increased to nearly 60% around 3 MLT and remained high until camera shutdown. The APA distribution in Figure 34a is smoother and more strongly peaked than that of Jones et al. (2011), and this is likely attributable to our larger dataset. A precise comparison between the number of hours is not possible since Jones et al. (2011) only indicated the number of dates their data covered. Compared to our PPA and PA distributions, their occurrence rate is too high and has too early and wide of a peak to likely correspond to a type other than APA. With this consideration in mind, we report a higher peak chance of occurrence than Jones et al. (2011). However, they suggested that their result may be lower relative to past studies by Kvitte and Pettersen (1969) and Oguti et al. (1981) due to the influence of the solar cycle. In contrast, our dataset covers almost an entire solar cycle.

Partamies et al. (2017) surveyed 10 years of optical data from five imagers part of the Magnetometers-Ionospheric Radars-All-sky Cameras Large Experiment (MIRACLE) network of all-sky cameras (Syrjäsuo et al., 1998; Sangalli et al., 2011) between 1997 and 2007. While they did not publish an occurrence probability distribution, they did report that the peak occurrence was between approximately 4 and 7 MLT. Without an occurrence rate to compare to, it is difficult to conclude



they predominantly observed APA, but PPA and PA do have a narrower peak in MLT than this. A stipulation of our dataset is that all three ASIs must simultaneously have clear visibility, so our data does not continue past the shutdown time of the lowest latitude camera in Pinawa. The MIRACLE cameras stationed in Lapland that Partamies et al. (2017) analyzed were not similarly constrained and could continue observing later, plausibly explaining why their peak persisted until 7 MLT.

240 It is unknown which specific mechanisms and conditions are involved in each of these types of pulsating aurora, but structural similarity between PA and PPA (Grono and Donovan, 2018) indicates that they are differentiated only by the existence of modulating processes in the source region. This suggests that pulsation and structuring are the two fundamental aspects of pulsating aurora phenomenology. APA can begin to appear much earlier than PPA and PA, occurrence peaks earlier, and it seems to be the only type that can constitute an entire pulsating auroral event on its own (Grono and Donovan, 2018).

245 The occurrence distributions of APA, PPA, and PA were mapped into the equatorial plane of the magnetosphere. These mappings correspond to the average locations of their source regions, and they agree with observations reported by other studies. PPA and PA are predominantly constrained between 4 and  $\sim 9 R_E$ , while a portion of the APA distribution maps beyond this, as far out as  $\sim 15 R_E$ .

Moving forward, there are three key questions pertaining to the conditions and mechanisms driving pulsating auroras: *what*  
250 *processes are responsible for the structuring of PPA and PA?*, *why does PA not pulsate?*, and *does APA play a role in the onset of PPA and PA?*

*Data availability.* The complete set of Figure 2-style images for the entire dataset is available in Grono (2019). THEMIS ASI data is available from [http://data.phys.ucalgary.ca/sort\\_by\\_project/THEMIS/asi/stream0/](http://data.phys.ucalgary.ca/sort_by_project/THEMIS/asi/stream0/). Planetary K-index data was retrieved from the National Oceanic and Atmospheric Administration Space Weather Prediction Center at [ftp://ftp.swpc.noaa.gov/pub/indices/old\\_indices/](ftp://ftp.swpc.noaa.gov/pub/indices/old_indices/). Solar wind  
255 velocity was obtained via Operating Missions as Nodes on the Internet (OMNI).

*Author contributions.* EG programmed, analyzed, wrote the work, and designed the figures. ED is his supervisor and assisted with analysis.

*Competing interests.* No competing interests are present.

*Acknowledgements.* This research was supported by grants from the Natural Science and Engineering Research Council (NSERC) of Canada and Danish Technical University (DTU). Thanks to Emma Spanswick, Harald Frey, and Stephen Mende for All-Sky data from the NASA  
260 Time History of Events and Macroscale Interactions during Substorms (THEMIS) mission.

## References

- Angelopoulos, V.: The THEMIS Mission, *Space Science Reviews*, 141, 5–34, <https://doi.org/10.1007/s11214-008-9336-1>, 2008.
- Donovan, E., Mende, S., Jackel, B., Frey, H., Syrjäsuo, M., Voronkov, I., Trondsen, T., Peticolas, L., Angelopoulos, V., Harris, S., Greffen, M., and Connors, M.: The THEMIS all-sky imaging array – system design and initial results from the prototype imager, *Journal of Atmospheric and Solar-Terrestrial Physics*, 68, 1472–1487, <https://doi.org/10.1016/j.jastp.2005.03.027>, 2006.
- 265 Donovan, E. F., Jackel, B. J., Voronkov, I., Sotirelis, T., Creutzberg, F., and Nicholson, N. A.: Ground-based optical determination of the b2i boundary: A basis for an optical MT-index, *Journal of Geophysical Research (Space Physics)*, 108, 1115, <https://doi.org/10.1029/2001JA009198>, 2003.
- Eather, R. H., Mende, S. B., and Judge, R. J. R.: Plasma injection at synchronous orbit and spatial and temporal auroral morphology, *Journal of Geophysical Research*, 81, 2805–2824, <https://doi.org/10.1029/JA081i016p02805>, 1976.
- 270 Grono, E.: Replication data for: Surveying Pulsating Auroras, *Scholars Portal Dataverse*, <https://doi.org/10.5683/SP2/MICSLT>, 2019.
- Grono, E. and Donovan, E.: Differentiating diffuse auroras based on phenomenology, *Annales Geophysicae*, 36, 891–898, <https://doi.org/10.5194/angeo-36-891-2018>, <https://www.ann-geophys.net/36/891/2018/>, 2018.
- Grono, E. and Donovan, E.: Constraining the Source Regions of Pulsating Auroras, *Geophysical Research Letters*, 46, 10267–10273, <https://doi.org/10.1029/2019GL084611>, 2019.
- 275 Grono, E., Donovan, E., and Murphy, K. R.: Tracking patchy pulsating aurora through all-sky images, *Annales Geophysicae*, 35, 777–784, <https://doi.org/10.5194/angeo-35-777-2017>, 2017.
- Johnstone, A. D.: Pulsating aurora, *Nature*, 274, 119–126, <https://doi.org/10.1038/274119a0>, 1978.
- Jones, S. L., Lessard, M. R., Fernandes, P. A., Lummerzheim, D., Semeter, J. L., Heinselman, C. J., Lynch, K. A., Michell, R. G., Kintner, P. M., Stenbaek-Nielsen, H. C., and Asamura, K.: PFISR and ROPA observations of pulsating aurora, *Journal of Atmospheric and Solar-Terrestrial Physics*, 71, 708–716, <https://doi.org/10.1016/j.jastp.2008.10.004>, 2009.
- 280 Jones, S. L., Lessard, M. R., Rychert, K., Spanswick, E., and Donovan, E.: Large-scale aspects and temporal evolution of pulsating aurora, *Journal of Geophysical Research (Space Physics)*, 116, A03214, <https://doi.org/10.1029/2010ja015840>, 2011.
- Jones, S. L., Lessard, M. R., Rychert, K., Spanswick, E., Donovan, E., and Jaynes, A. N.: Persistent, widespread pulsating aurora: A case study, *Journal of Geophysical Research (Space Physics)*, 118, 2998–3006, <https://doi.org/10.1002/jgra.50301>, 2013.
- 285 Kvitte, G. J. and Pettersen, H.: Morphology of the pulsating aurora, *Planetary and Space Science*, 17, 1599–1607, [https://doi.org/10.1016/0032-0633\(69\)90148-2](https://doi.org/10.1016/0032-0633(69)90148-2), 1969.
- Li, W., Bortnik, J., Thorne, R. M., and Angelopoulos, V.: Global distribution of wave amplitudes and wave normal angles of chorus waves using THEMIS wave observations, *Journal of Geophysical Research (Space Physics)*, 116, A12205, <https://doi.org/10.1029/2011JA017035>, 2011.
- 290 Mende, S. B., Harris, S. E., Frey, H. U., Angelopoulos, V., Russell, C. T., Donovan, E., Jackel, B., Greffen, M., and Peticolas, L. M.: The THEMIS Array of Ground-based Observatories for the Study of Auroral Substorms, *Space Science Reviews*, 141, 357–387, <https://doi.org/10.1007/s11214-008-9380-x>, 2008.
- Nishimura, Y., Bortnik, J., Li, W., Thorne, R. M., Lyons, L. R., Angelopoulos, V., Mende, S. B., Bonnell, J. W., Le Contel, O., Cully, C., Ergun, R., and Auster, U.: Identifying the Driver of Pulsating Aurora, *Science*, 330, 81, <https://doi.org/10.1126/science.1193186>, 2010.
- 295

- Nishimura, Y., Bortnik, J., Li, W., Thorne, R. M., Chen, L., Lyons, L. R., Angelopoulos, V., Mende, S. B., Bonnell, J., Le Contel, O., Cully, C., Ergun, R., and Auster, U.: Multievent study of the correlation between pulsating aurora and whistler mode chorus emissions, *Journal of Geophysical Research (Space Physics)*, 116, A11221, <https://doi.org/10.1029/2011JA016876>, 2011.
- 300 Oguti, T., Kokubun, S., Hayashi, K., Tsuruda, K., Machida, S., Kitamura, T., Saka, O., and Watanabe, T.: Statistics of pulsating auroras on the basis of all-sky TV data from five stations. I. Occurrence frequency., *Canadian Journal of Physics*, 59, 1150–1157, <https://doi.org/10.1139/p81-152>, 1981.
- Ozaki, M., Miyoshi, Y., Shiokawa, K., Hosokawa, K., Oyama, S.-i., Kataoka, R., Ebihara, Y., Ogawa, Y., Kasahara, Y., Yagitani, S., Kasaba, Y., Kumamoto, A., Tsuchiya, F., Matsuda, S., Katoh, Y., Hikishima, M., Kurita, S., Otsuka, Y., Moore, R. C., Tanaka, Y., Nosé, M., Nagatsuma, T., Nishitani, N., Kadokura, A., Connors, M., Inoue, T., Matsuoka, A., and Shinohara, I.: Visualization of rapid electron  
305 precipitation via chorus element wave–particle interactions, *Nature Communications*, 10, <https://doi.org/10.1038/s41467-018-07996-z>, <https://doi.org/10.1038/s41467-018-07996-z>, 2019.
- Partamies, N., Whiter, D., Kadokura, A., Kauristie, K., Nesse Tyssøy, H., Massetti, S., Stauning, P., and Raita, T.: Occurrence and average behavior of pulsating aurora, *Journal of Geophysical Research (Space Physics)*, 122, 5606–5618, <https://doi.org/10.1002/2017JA024039>, 2017.
- 310 Partamies, N., Bolmgren, K., Heino, E., Ivchenko, N., Borovsky, J. E., and Sundberg, H.: Patch Size Evolution During Pulsating Aurora, *Journal of Geophysical Research: Space Physics*, 124, 4725–4738, <https://doi.org/10.1029/2018JA026423>, <https://agupubs.onlinelibrary.wiley.com/doi/abs/10.1029/2018JA026423>, 2019.
- Royrvik, O. and Davis, T. N.: Pulsating aurora - Local and global morphology, *Journal of Geophysical Research*, 82, 4720–4740, <https://doi.org/10.1029/JA082i029p04720>, 1977.
- 315 Sangalli, L., Partamies, N., Syrjäsoo, M., Enell, C. F., Kauristie, K., and Mäkinen, S.: Performance study of the new EMCCD-based all-sky cameras for auroral imaging, *International Journal of Remote Sensing*, 32, 2987–3003, <https://doi.org/10.1080/01431161.2010.541505>, 2011.
- Sergeev, V. A., Sazhina, E. M., Tsyganenko, N. A., Lundblad, J. A., and Soraas, F.: Pitch-angle scattering of energetic protons in the magnetotail current sheet as the dominant source of their isotropic precipitation into the nightside ionosphere, *Planetary and Space Science*,  
320 31, 1147–1155, [https://doi.org/10.1016/0032-0633\(83\)90103-4](https://doi.org/10.1016/0032-0633(83)90103-4), 1983.
- Shiokawa, K., Nakajima, A., Ieda, A., Sakaguchi, K., Nomura, R., Aslaksen, T., Greffen, M., and Donovan, E.: Rayleigh-Taylor type instability in auroral patches, *Journal of Geophysical Research (Space Physics)*, 115, A02211, <https://doi.org/10.1029/2009JA014273>, 2010.
- Spanwick, E., Donovan, E., Kepko, L., and Angelopoulos, V.: The Magnetospheric Source Region of the Bright Proton Aurora, *Geophysical Research Letters*, 44, 10,094–10,099, <https://doi.org/10.1002/2017GL074956>, 2017.
- 325 Syrjäsoo, M., Pulkkinen, T. I., Janhunen, P., Viljanen, A., Pellinen, R. J., Kauristie, K., Opgenoorth, H. J., Wallman, S., Eglitis, P., Karlsson, P., Amm, O., Nielsen, E., and Thomas, C.: Observations of Substorm Electrodynamics Using the MIRACLE Network, in: *Substorms-4*, edited by Kokubun, S. and Kamide, Y., vol. 238 of *Astrophysics and Space Science Library*, p. 111, [https://doi.org/10.1007/978-0-7923-5465-9\\_23](https://doi.org/10.1007/978-0-7923-5465-9_23), 1998.
- Tsyganenko, N. A.: Pitch-angle scattering of energetic particles in the current sheet of the magnetospheric tail and stationary distribution  
330 functions, *Planetary and Space Science*, 30, 433–437, [https://doi.org/10.1016/0032-0633\(82\)90052-6](https://doi.org/10.1016/0032-0633(82)90052-6), 1982.
- Tsyganenko, N. A.: A magnetospheric magnetic field model with a warped tail current sheet, *Planetary and Space Science*, 37, 5–20, [https://doi.org/10.1016/0032-0633\(89\)90066-4](https://doi.org/10.1016/0032-0633(89)90066-4), 1989.

- Yang, B., Donovan, E., Liang, J., Ruohoniemi, J. M., and Spanswick, E.: Using patchy pulsating aurora to remote sense magnetospheric convection, *Geophysical Research Letters*, 42, 5083–5089, <https://doi.org/10.1002/2015GL064700>, 2015.
- 335 Yang, B., Donovan, E., Liang, J., and Spanswick, E.: A statistical study of the motion of pulsating aurora patches: using the THEMIS All-Sky Imager, *Annales Geophysicae*, 35, 217–225, <https://doi.org/10.5194/angeo-35-217-2017>, 2017.
- Yang, B., Spanswick, E., Liang, J., Grono, E., and Donovan, E.: Responses of Different Types of Pulsating Aurora in Cosmic Noise Absorption, *Geophysical Research Letters*, 46, 5717–5724, <https://doi.org/10.1029/2019GL083289>, 2019.

# Interactive comment on “Surveying pulsating auroras” by Eric Grono and Eric Donovan

**Anonymous Referee #2**

*Received and published: 21 November 2019*

This paper describes a large survey of the occurrence of 3 different types of pulsating aurora. The latitudes and local times of the pulsating events are mapped into the equatorial plane using a magnetic field model. This is a valuable addition to the scientific literature and will help to constrain theories for the formation of pulsating aurora and patchy aurora. In general the paper is well written, but there are some parts which are more difficult to follow than they could be.

I recommend that this paper is published in *Annales Geophysicae*, but have some questions and suggestions for improvements which I have listed below. The line numbers given here refer to the corrected manuscript, "angeo-2019-129-AC1-supplement".

## **Abstract:**

**Line 4-5:** This sentence seems to suggest that pulsating aurora is dominated by the amorphous type at all times (early morning and pre-midnight), without explicitly saying that. Perhaps more information on the other types could be added to make the meaning clearer and easier to interpret?

*This has been clarified.*

Could you add a comment on the relevance of the locations to which the different pulsating aurora types map? Does the location imply something about the source and/or generation mechanism? Maybe refer to the proton aurora here?

*This has been added.*

## **1. Introduction:**

**Line 60:** The sentence starting "Pulsating aurora is..." could be worded more clearly. How about something like "Pulsating aurora is a widespread type of aurora, but we do not yet understand its subcategories. These subcategories could provide valuable information about the state of the magnetosphere."

*Agreed, and fixed.*

## **2. Data and methodology:**

**Line 84:** "would also have" should be "also had" or "also has", or change the "was not" earlier in the sentence.

*Agreed, and fixed.*

You state that PPA and PA create pathlines in the keograms. Can you be sure that pathlines created by other features such as arcs could not be mistaken for patches?

*One cannot totally exclude the possibility, but it is generally possible to distinguish them. I identified events using keograms and in many cases where I felt there was ambiguity, I reviewed the full images. In no cases did I find I had confused discrete and diffuse auroras. I find misidentifying the type of pulsating aurora is the larger concern since there seems to be some gradation between the types. The presence of multiple pathlines having similar trajectories during a single event can be a helpful indicator when recognizing PA pathlines. Also, amorphous pulsating aurora (APA) seems to be part of every pulsating aurora event (Grono and Donovan, 2018), another helpful clue. A new figure has been added to help address this.*

**Figure 2:** What are the features appearing in the RANK keogram north of 72 degrees, that appear to be pulsating? Perhaps it would be helpful to also show a keogram with no pulsating aurora, to contrast with Figure 2?

*If I understand correctly which features you are referring to, these seem to be arcs. We have added a new figure to help address this.*

### **3. Results:**

**Line 135:** "Panel 3a" - I think this should be Panel 4a.

*Fixed.*

**Line 136:** "nearly as farther" should be "nearly as far".

*Fixed.*

**Line 137:** "panel 3b" should be 4b.

*Fixed.*

**Line 138:** The local maximum in the APA MLT histogram seems like it could be a single isolated MLT bin with a larger number of events, but there is actually a slight dip for this bin in the PA and PPA histograms. Could it be that some PA and PPA was mis-labeled as APA at this time?

*We were careful in our classifications, often reviewing videos of the ASI data to ensure we were accurate. As for the chance of misidentification, I do not see a mechanism which could be responsible for so many mislabelled events at this specific time. This would seem to correspond to tens of days worth of data being mislabelled at this particular MLT.*

*I have added "approximately" to this sentence to reflect the fact that they do not exactly align.*

In general you don't consider the possibility, likelihood or effect of mis-identification when discussing your results. Is there any way you could quantitatively estimate uncertainties on your occurrence percentages?

*We discuss ways in which classifications are ambiguous but cannot define a likelihood for misidentification to occur. We believe it is low due to the regular review of keogram data in movies of the full ASI images.*

### **4. Discussion and conclusions:**

**Line 149:** GSM is used here without the acronym being defined. Although this is a common acronym, it is worth defining for clarity. Similarly for GSE later.

*Fixed.*

**Line 147:** I realise explaining the method used is quite complicated, but this paragraph and the following one are difficult to follow. I think you are describing the exact process you use in your computer code, but probably the terminology could be reduced in the paper and the explanation simplified. Instead of using the terms "total bins" and "event bins", can you just say the 1 RE x 1 RE bins shown in Figure 5 count the number of events (i.e. rectangles on the keograms) that intersect that bin, when mapped using T89? Is this correct? You could include the detail that the events are mapped at a 1-minute resolution to determine intersection with the equatorial bins.

*Fixed.*

**Line 158:** I think one or two words are missing here around "passed". The sentence doesn't seem complete.

*Fixed.*

**Line 183:** "spacecraft" is plural, it doesn't need an s on the end.

*Fixed.*

**Line 185:** "This agrees with our observations." - Could you be more specific here? You are not measuring the proton aurora, right?

*Fixed.*

**Line 194 and 195:** Is "develop" the right word here? Perhaps "extends" on line 194 and "exist" or "is found" on line 195? To me "develop" implies a location of initial formation, which I don't think is what you mean.

*Fixed.*

**Line 203:** Do you mean Figure 4a rather than 3a?

*3a is what was intended. This section is comparing the probability of occurrence between the two studies, which Figure 4 does not contain. While Jones et al. (2011) does not feature a latitude distribution and ours is in MLAT and MLT, we think Figure 3 is the more insightful comparison, as opposed to Figure 4b.*
